# Supplementary material for: Synthesis and self-assembly of a D3h symmetric polycyclic aromatic hydrocarbon into a rigid 2D honeycomb network
Source: Royal Society of Chemistry journal article supplement (doi:10.1039/c6nj03962f), 2017-01-01

## Supplementary Information for

### **Synthesis and self-assembly of a $D_{3h}$ symmetric polycyclic aromatic hydrocarbon into a rigid 2D honeycomb network**

**Liyan Zhang<sup>a</sup>, Jinling Li<sup>b</sup>, Shuhai Qiu,<sup>a</sup> Xiaobo Huang<sup>c</sup> and Zebing Zeng<sup>\*a</sup>**

<sup>a</sup> State Key Laboratory of Chemo/Biosensing and Chemometrics, College of Chemistry and Chemical Engineering, Hunan University, Changsha 410082, P. R. China; <sup>b</sup> School of Material Science & Engineering, Henan University of technology, Zhengzhou 450001, Henan, P.R.China. <sup>c</sup> College of Chemistry and Materials Engineering, Wenzhou University, Wenzhou 325035, P. R. China.

E-mail: [zbzeng@hnu.edu.cn](mailto:zbzeng@hnu.edu.cn)

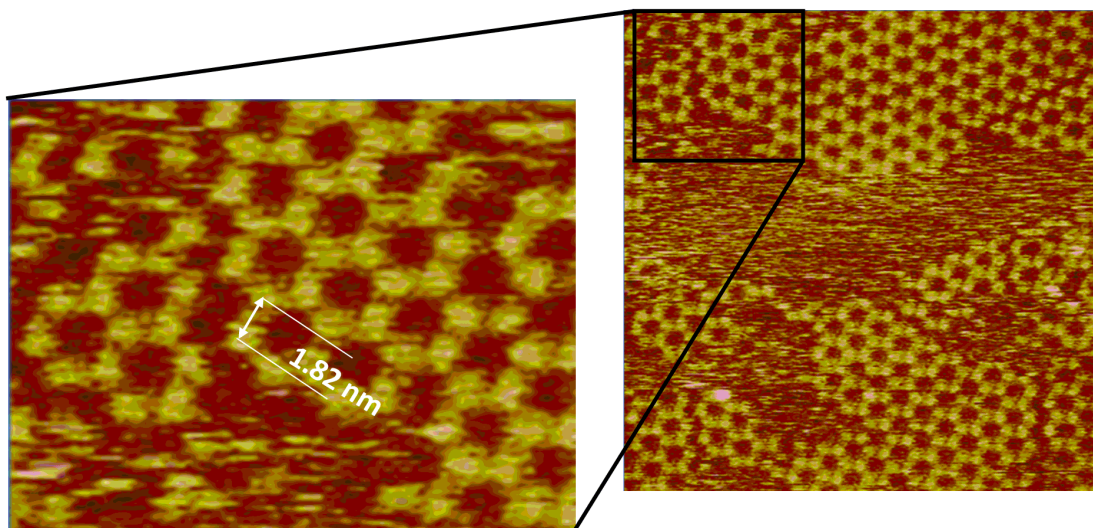

**Fig. S1** A STM image after adsorption of 4,4'-bipyridine guests within the supramolecular honeycomb network at the liquid (1-phenyloctane) – solid (HOPG) interface: ( $60 \times 60 \text{ nm}^2$ ,  $I_{\text{set}} = 145 \text{ pA}$ ,  $V_{\text{set}} = -1100 \text{ mV}$ ).

Mass spectra,  $^1\text{H}$  NMR and  $^{13}\text{C}$  NMR spectra for the synthesized compounds:

Mass spectrum(MALDI-TOF)  $[\text{M}]^-$  spectrum of compound **4**.

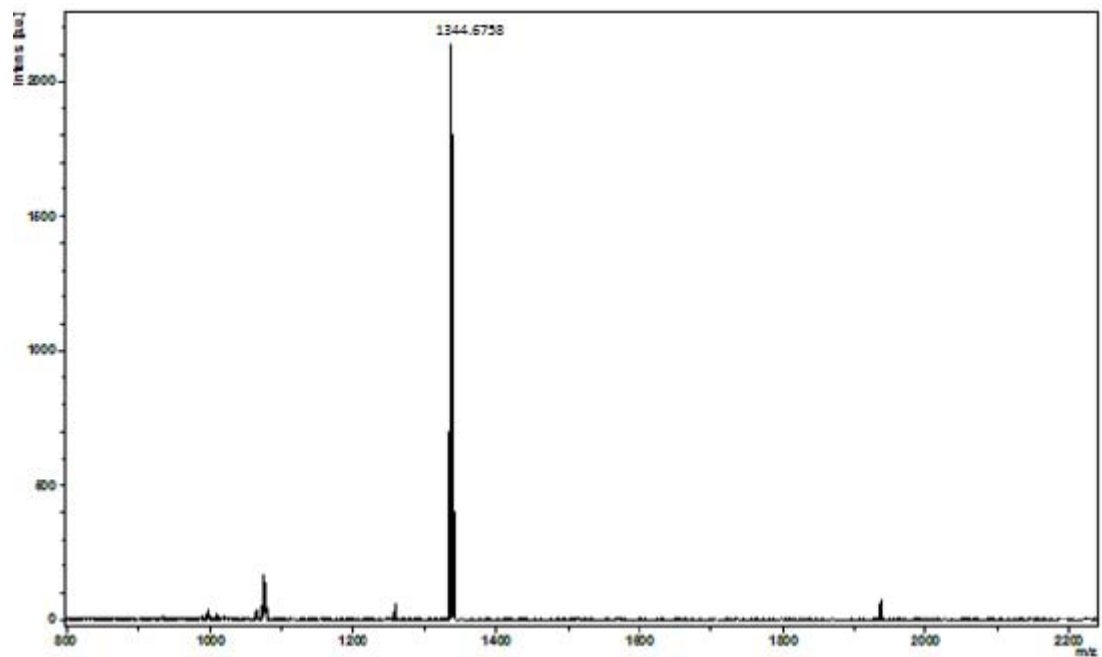

Mass spectrum(MALDI-TOF)  $[\text{M}+\text{Na}]^+$  spectrum of compound **HBC-COOH**.

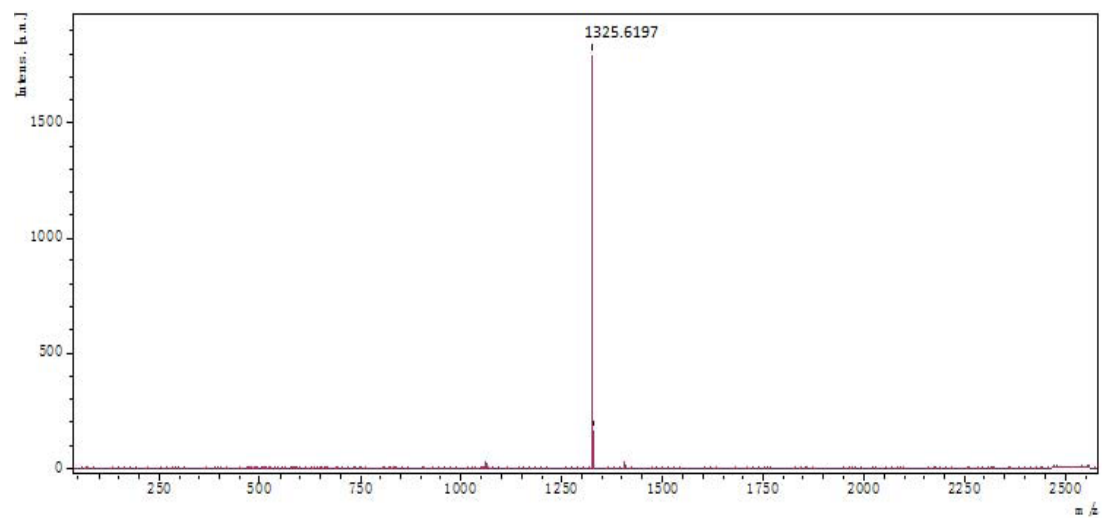

<sup>1</sup>H NMR spectrum of **Compound 1** (CDCl<sub>3</sub>, 300 MHz, RT)

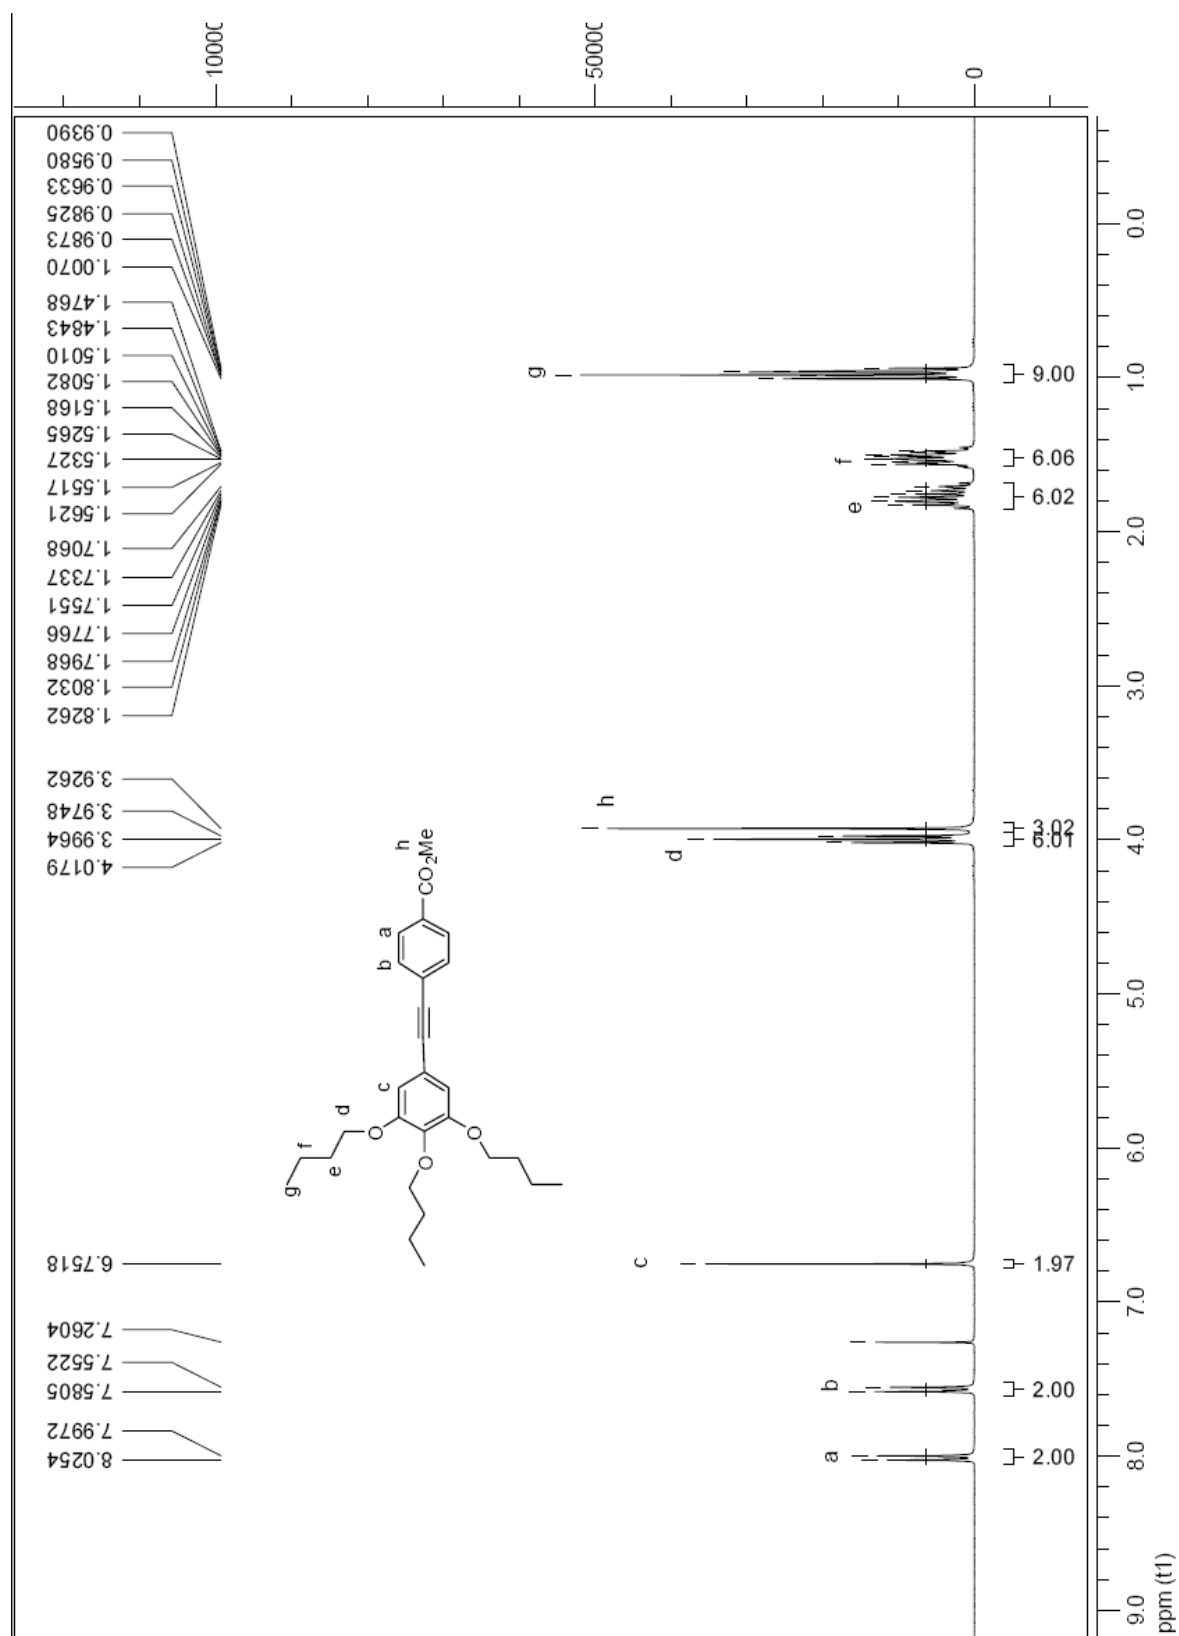

$^{13}\text{C}$  NMR spectrum of **Compound 1** ( $\text{CDCl}_3$ , 75 MHz, RT)

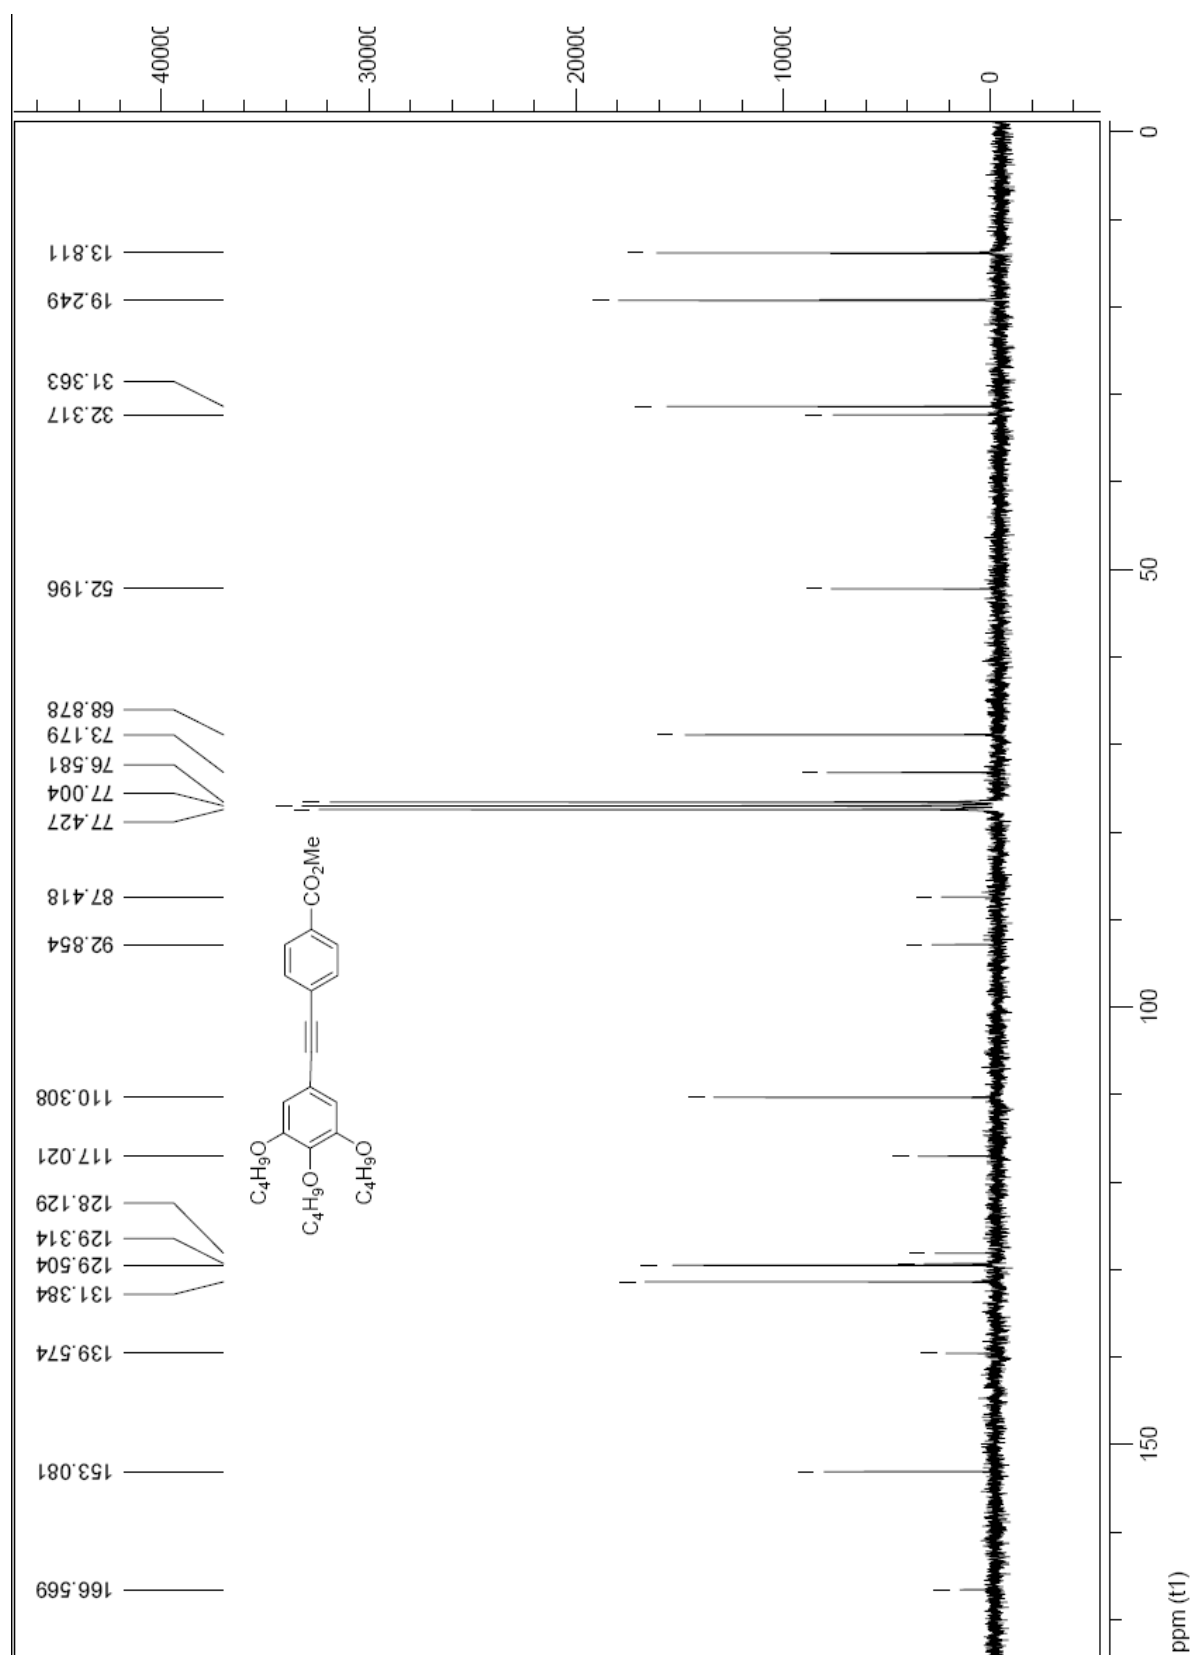

$^1\text{H}$  NMR spectrum of **Compound 2** ( $\text{CDCl}_3$ , 300 MHz, RT)

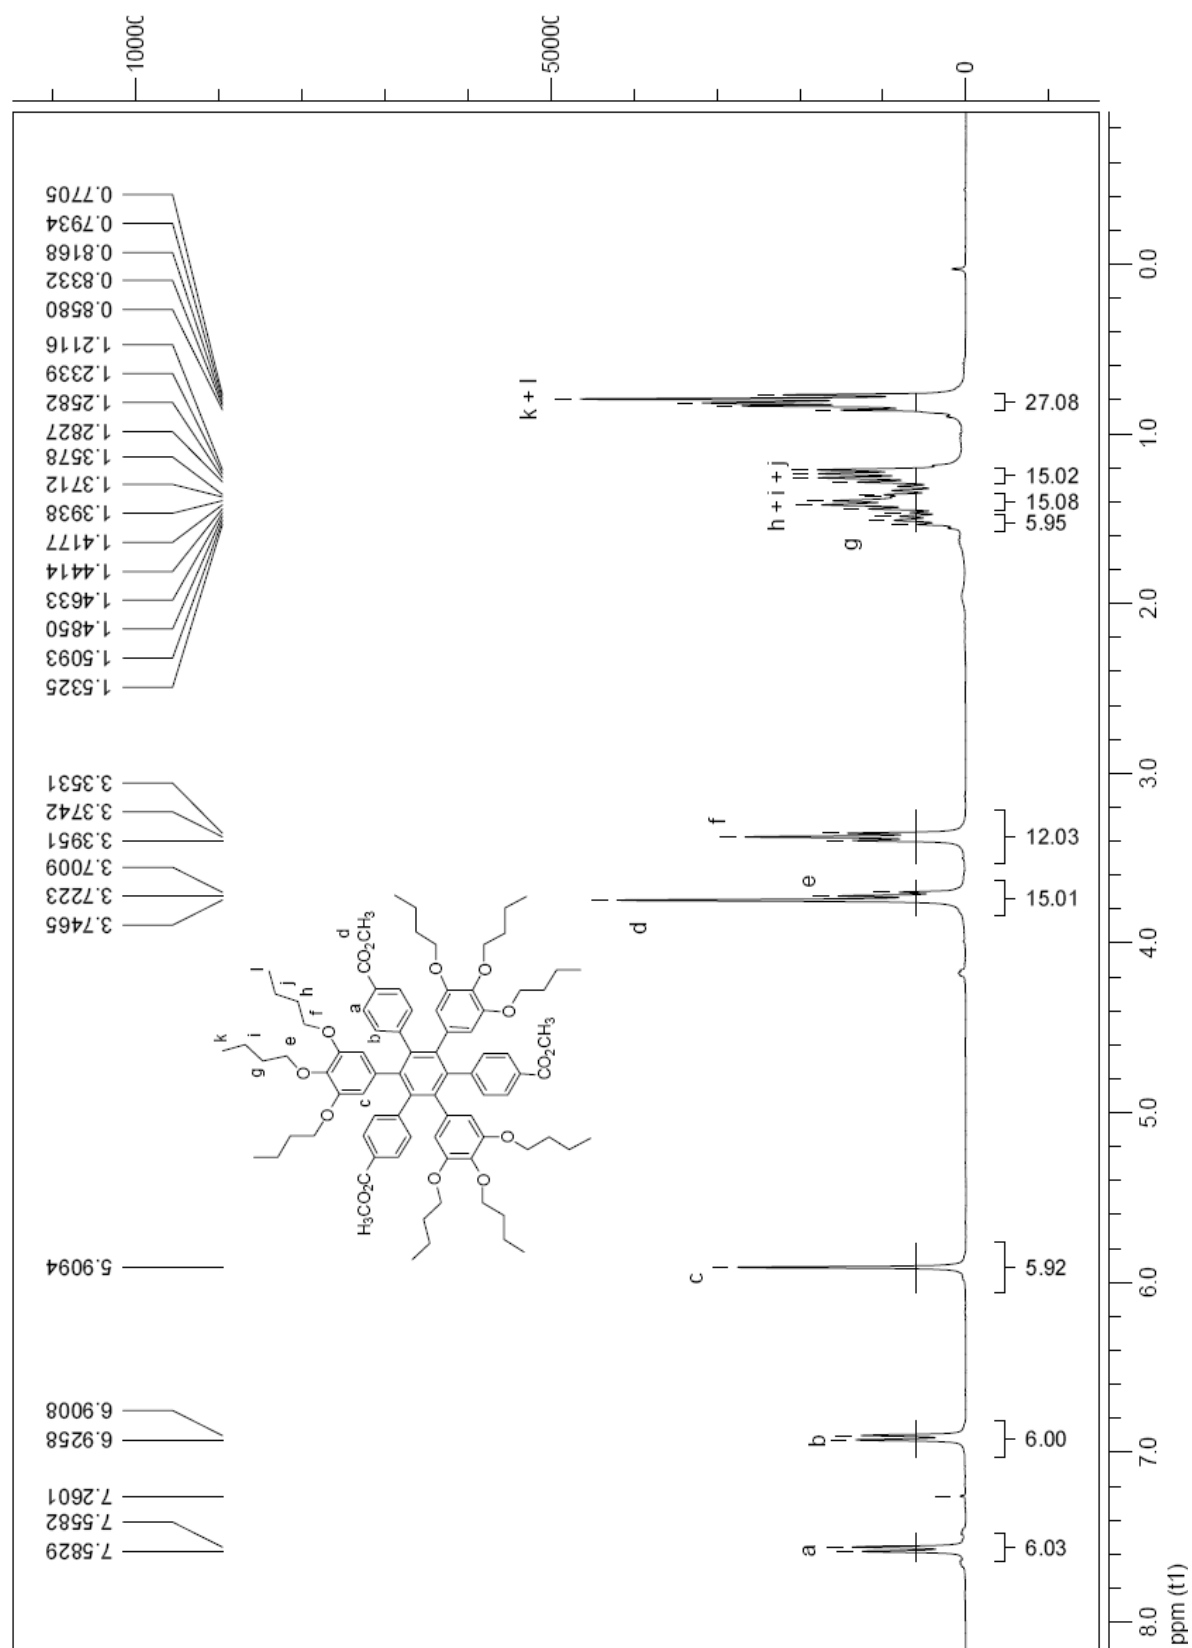

$^{13}\text{C}$  NMR spectrum of **Compound 2** ( $\text{CDCl}_3$ , 75 MHz, RT)

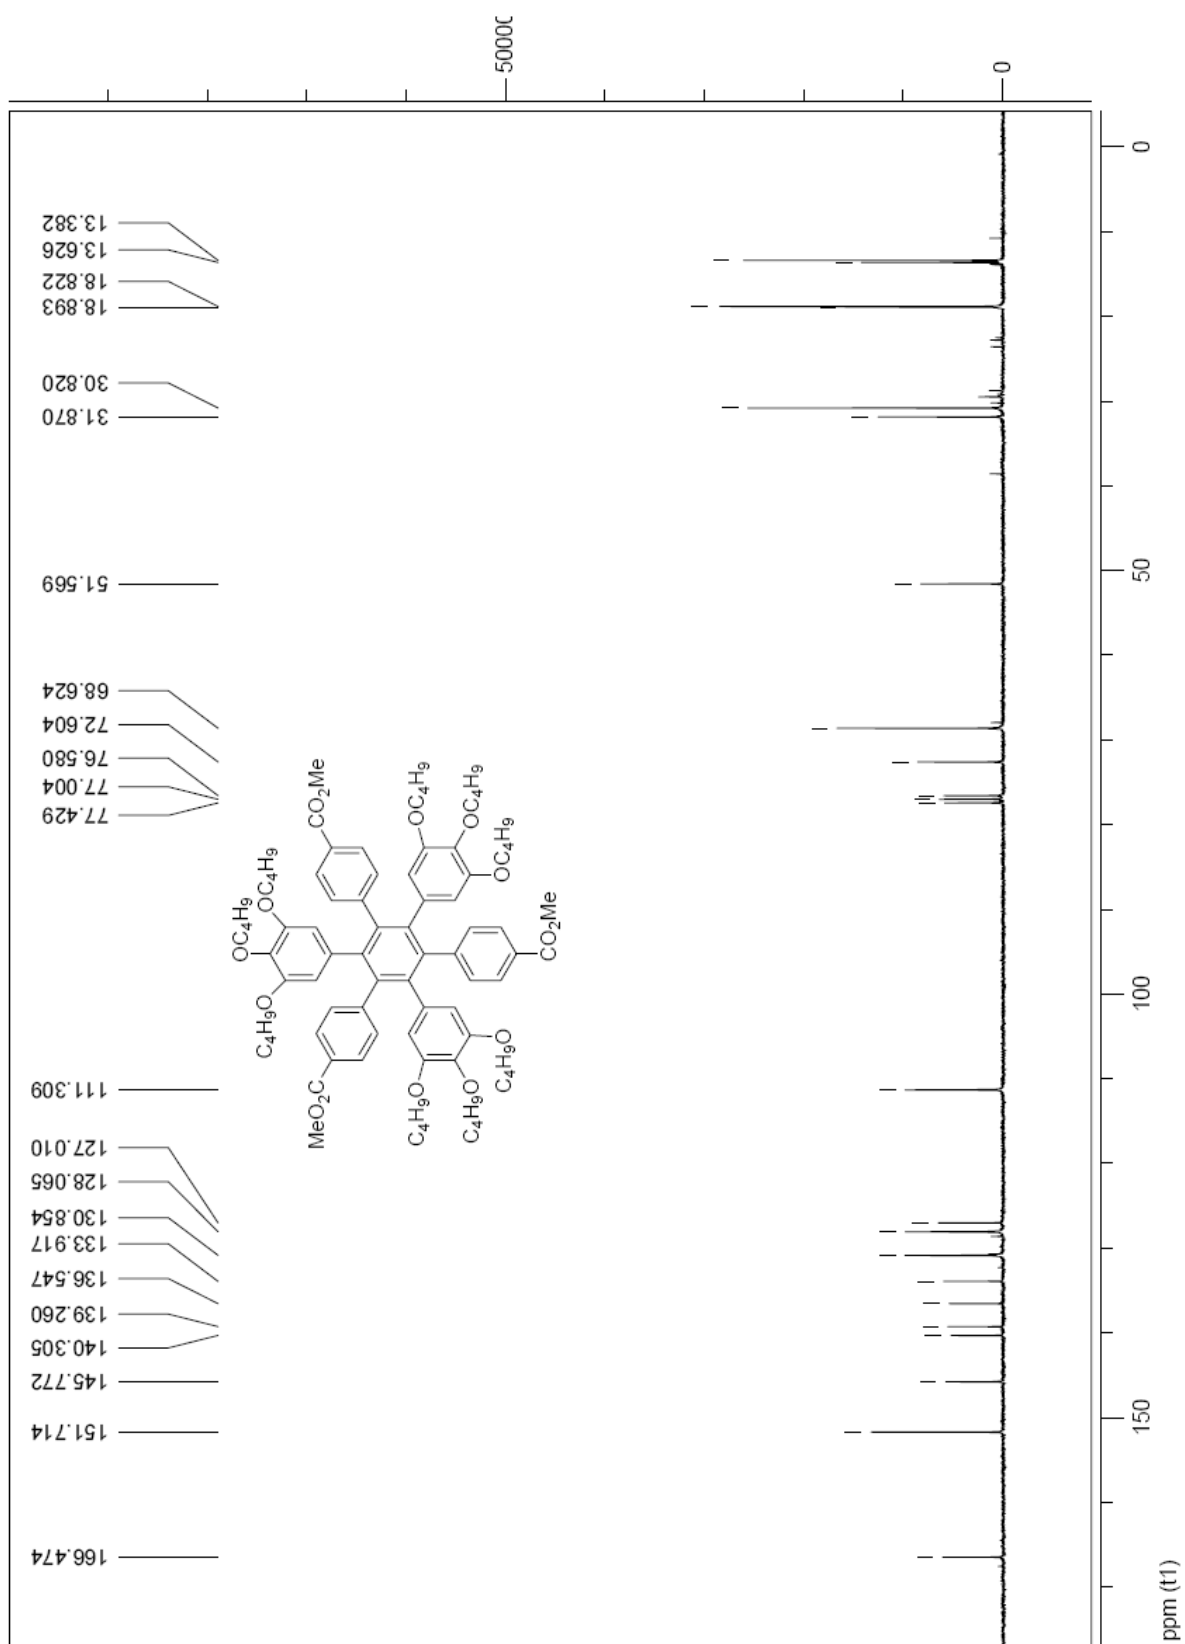

$^1\text{H}$  NMR spectrum of **Compound 3** ( $\text{CDCl}_3$ , 300 MHz, RT)

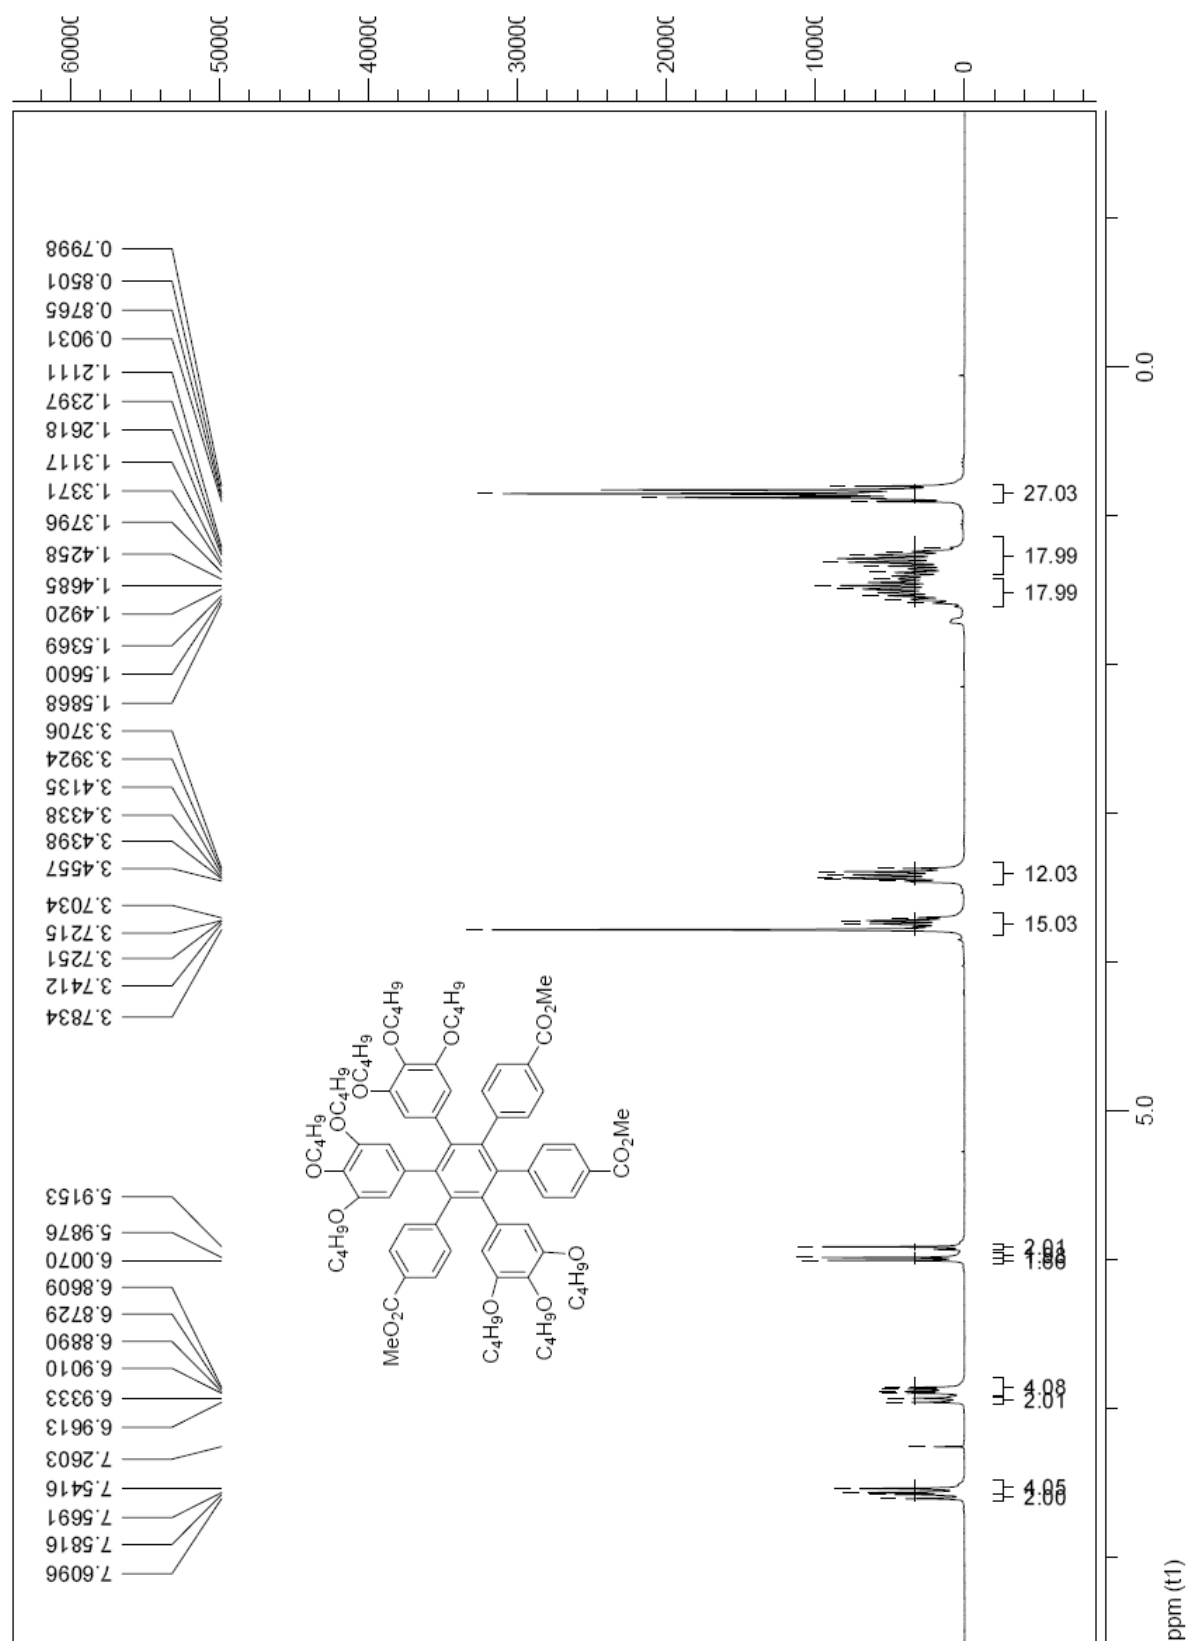



$^{13}\text{C}$  NMR spectrum of **Compound 3** ( $\text{CDCl}_3$ , 75 MHz, RT)

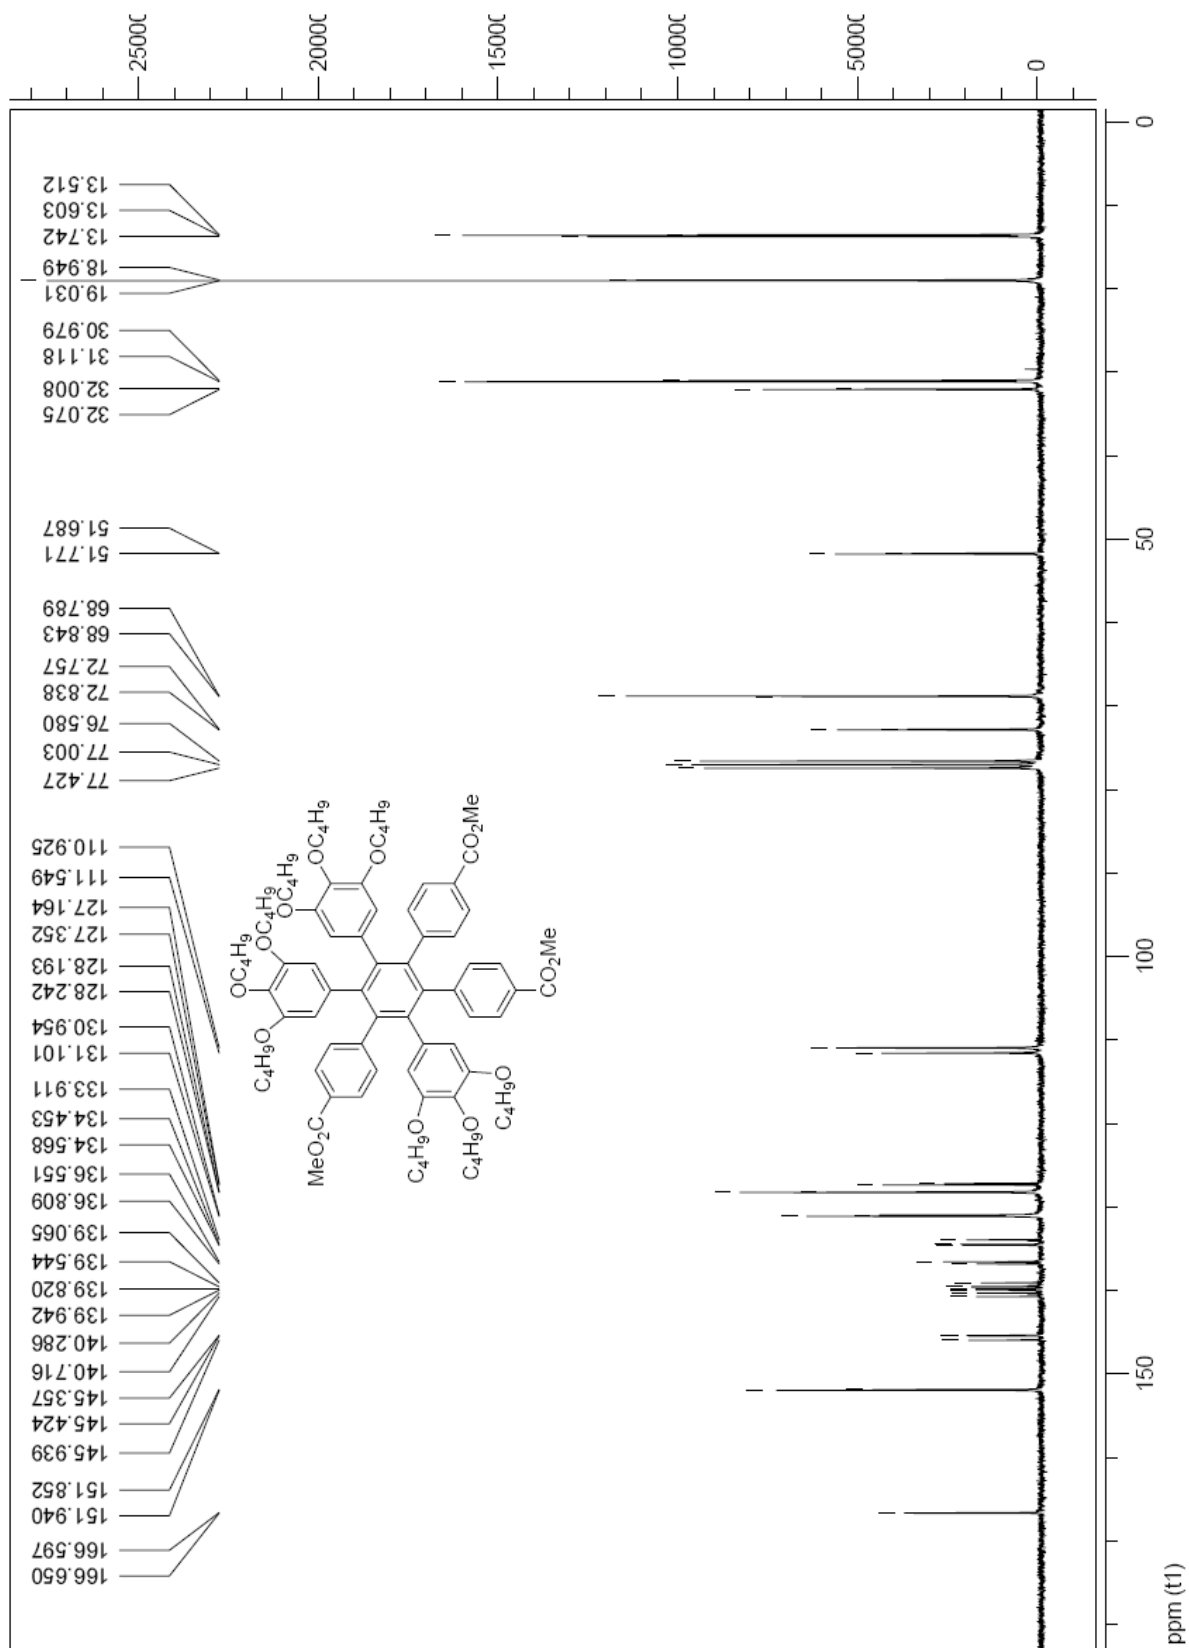

$^1\text{H}$  NMR spectrum of **Compound 4** ( $\text{CDCl}_3$ , 300 MHz, RT)

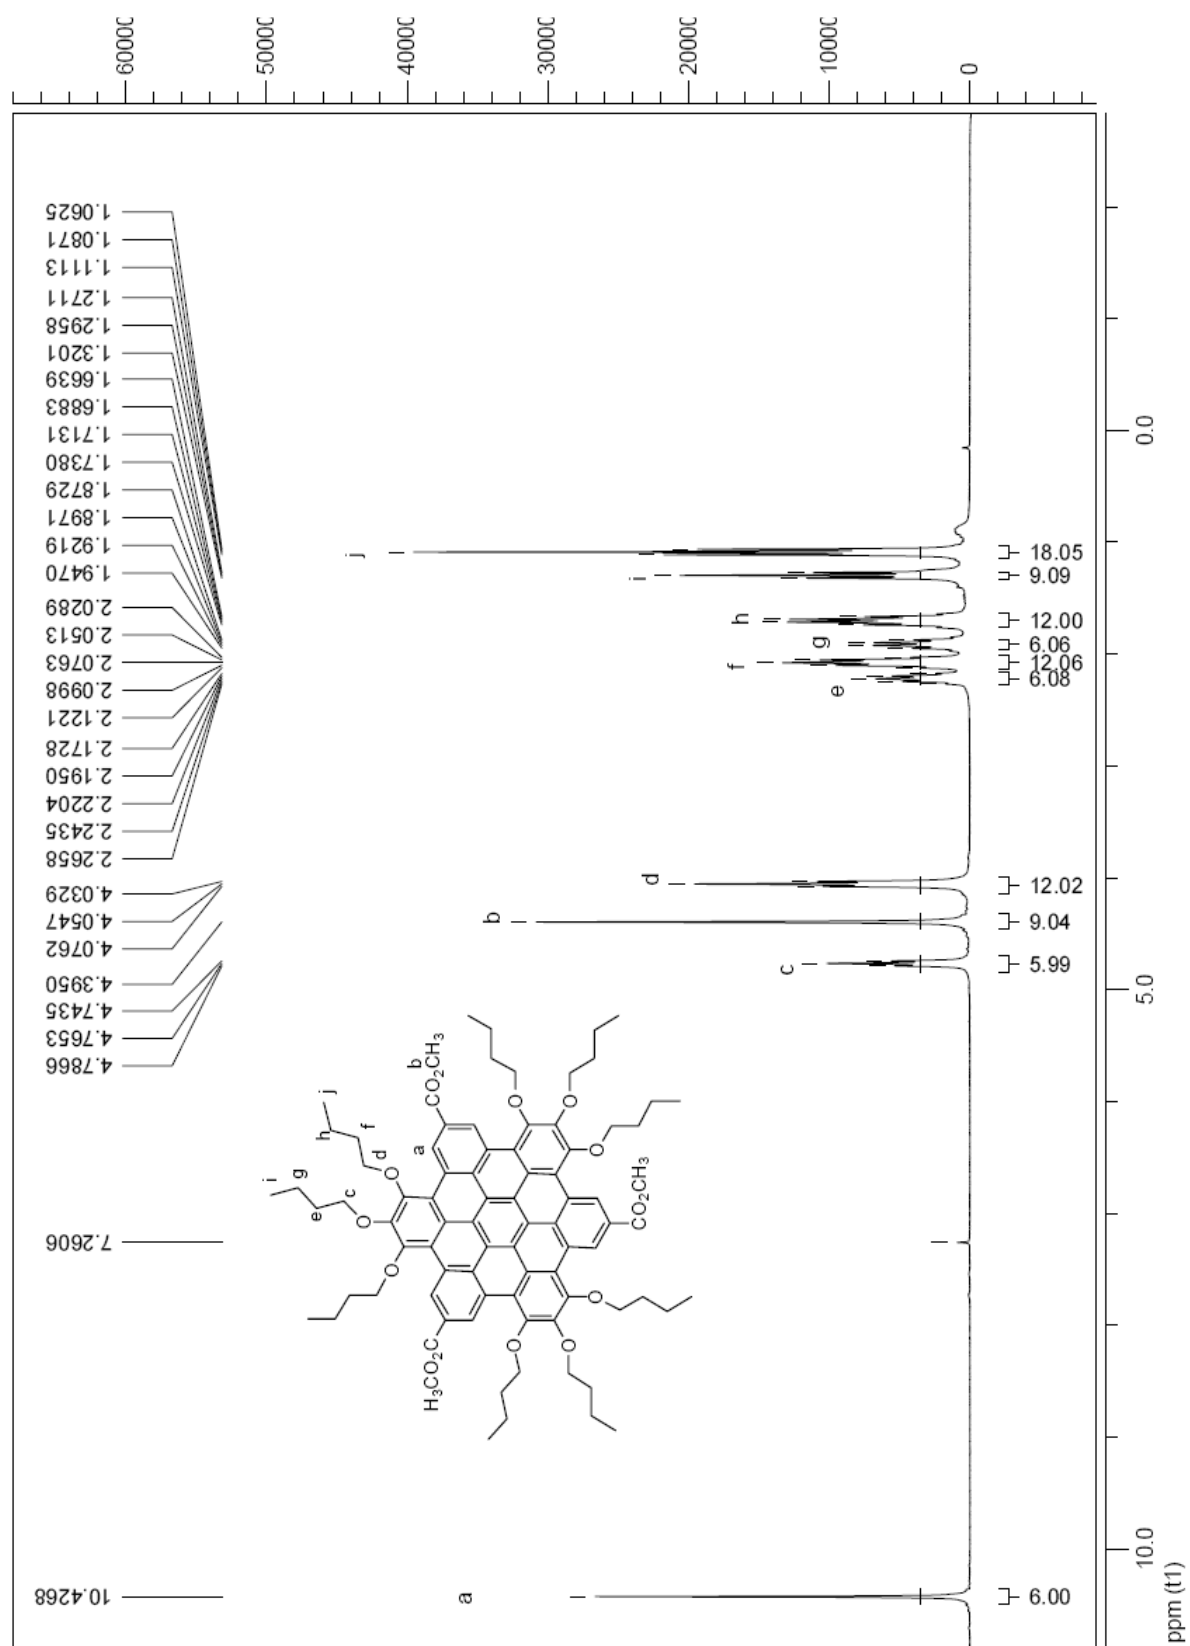

$^{13}\text{C}$  NMR spectrum of **Compound 4** ( $\text{CDCl}_3$ , 75 MHz, RT)

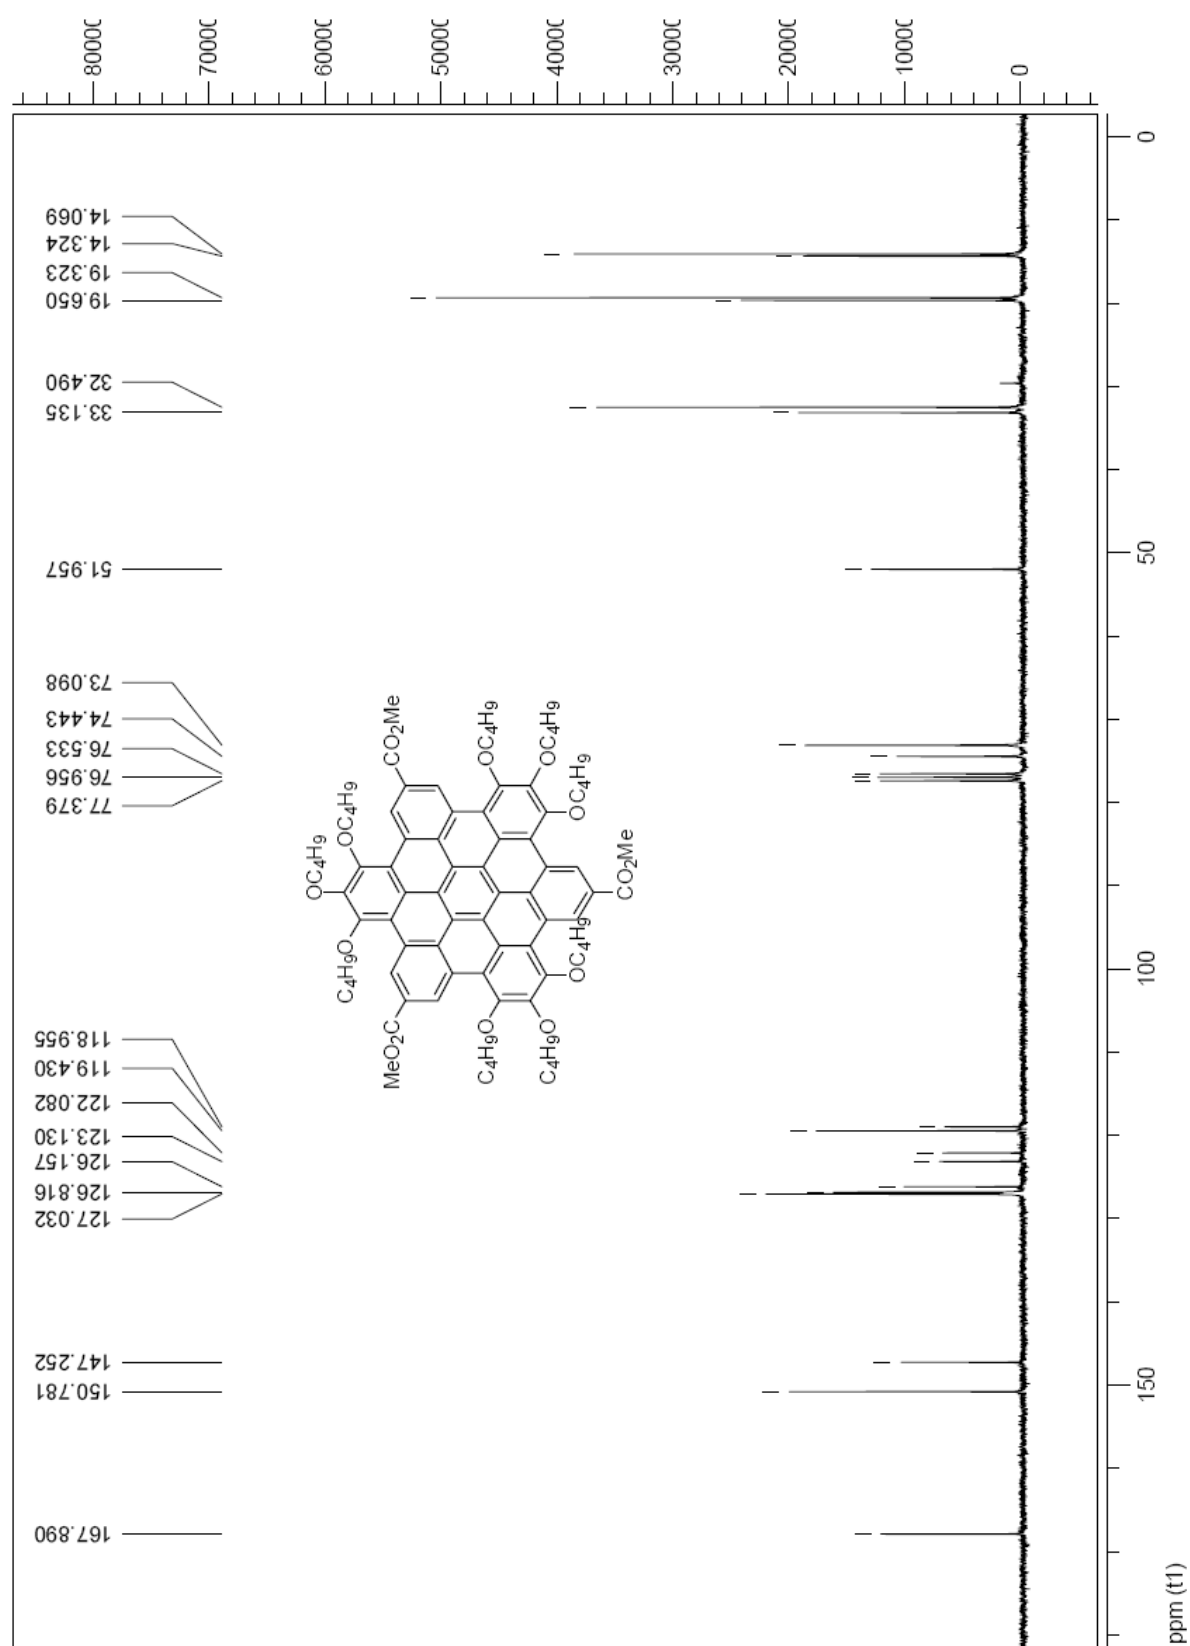

$^1\text{H}$  NMR spectrum of **HBC-COOH** (THF- $d_8$ , 300 MHz, RT)

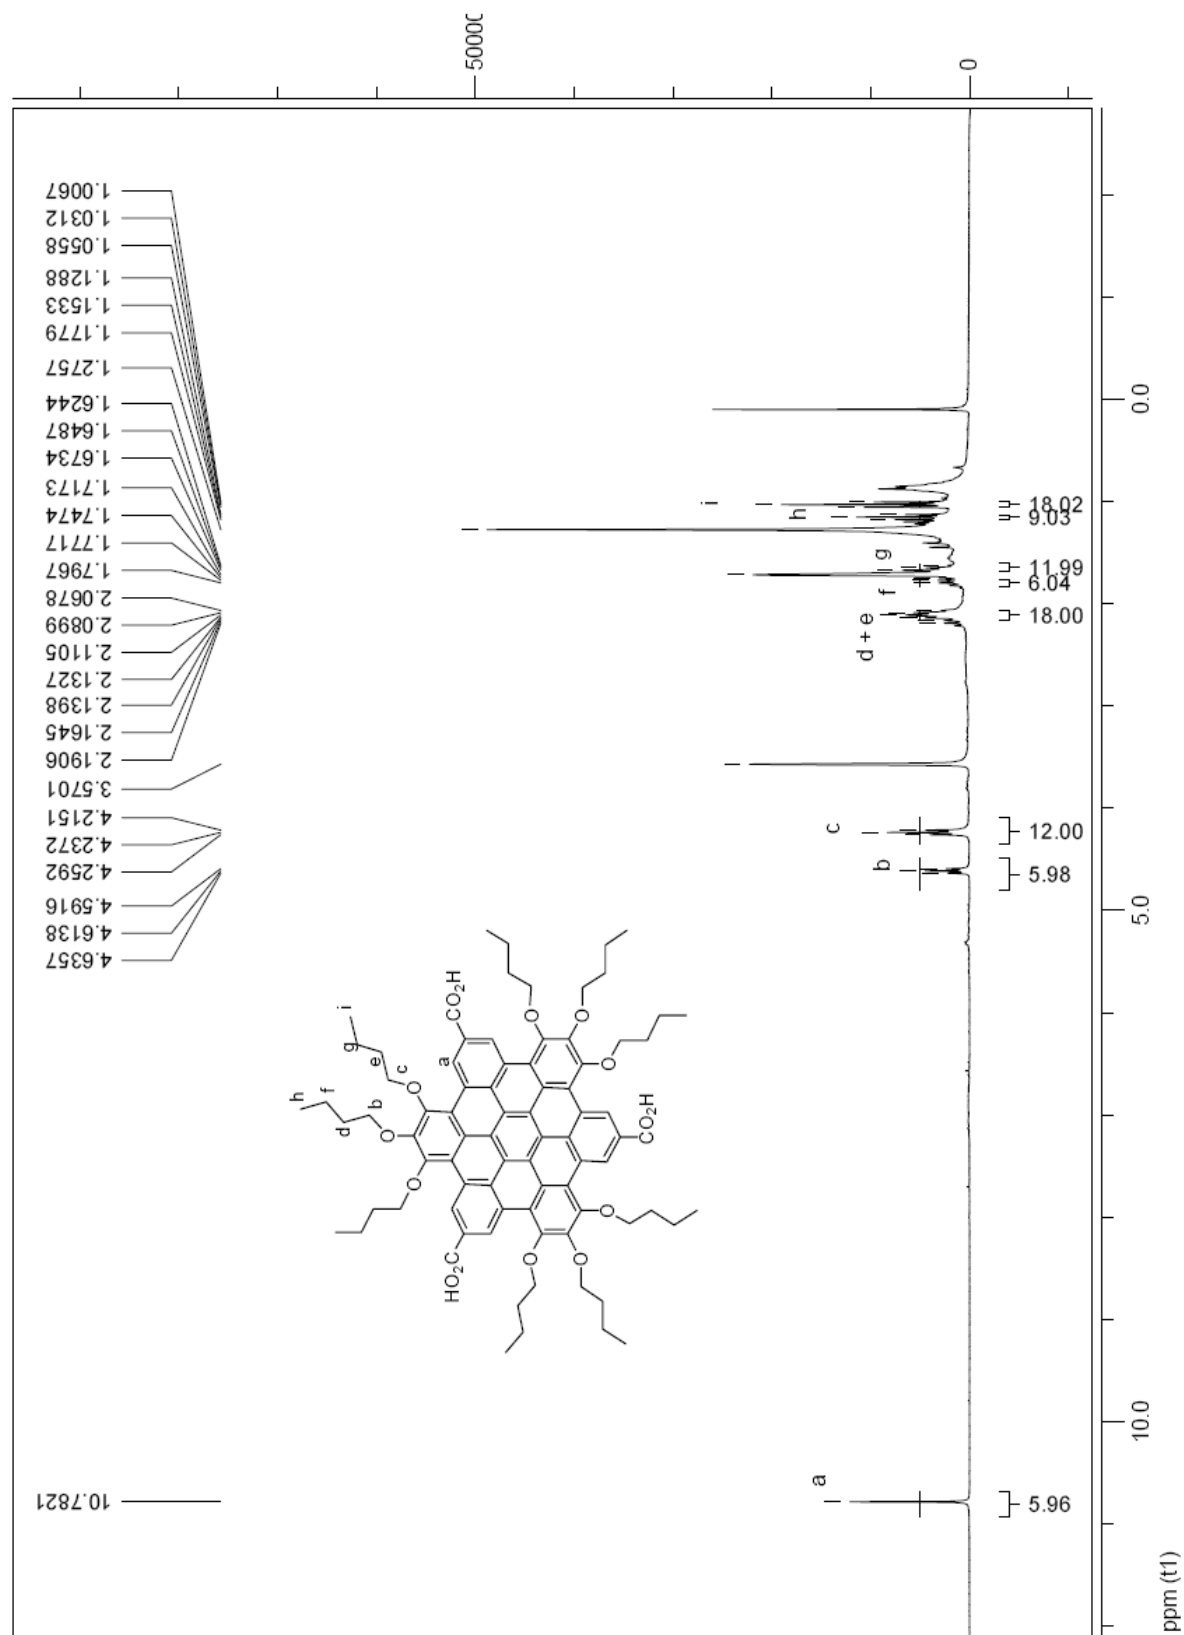

$^{13}\text{C}$  NMR spectrum of **HBC-COOH** (THF- $d_8$ , 75 MHz, RT)

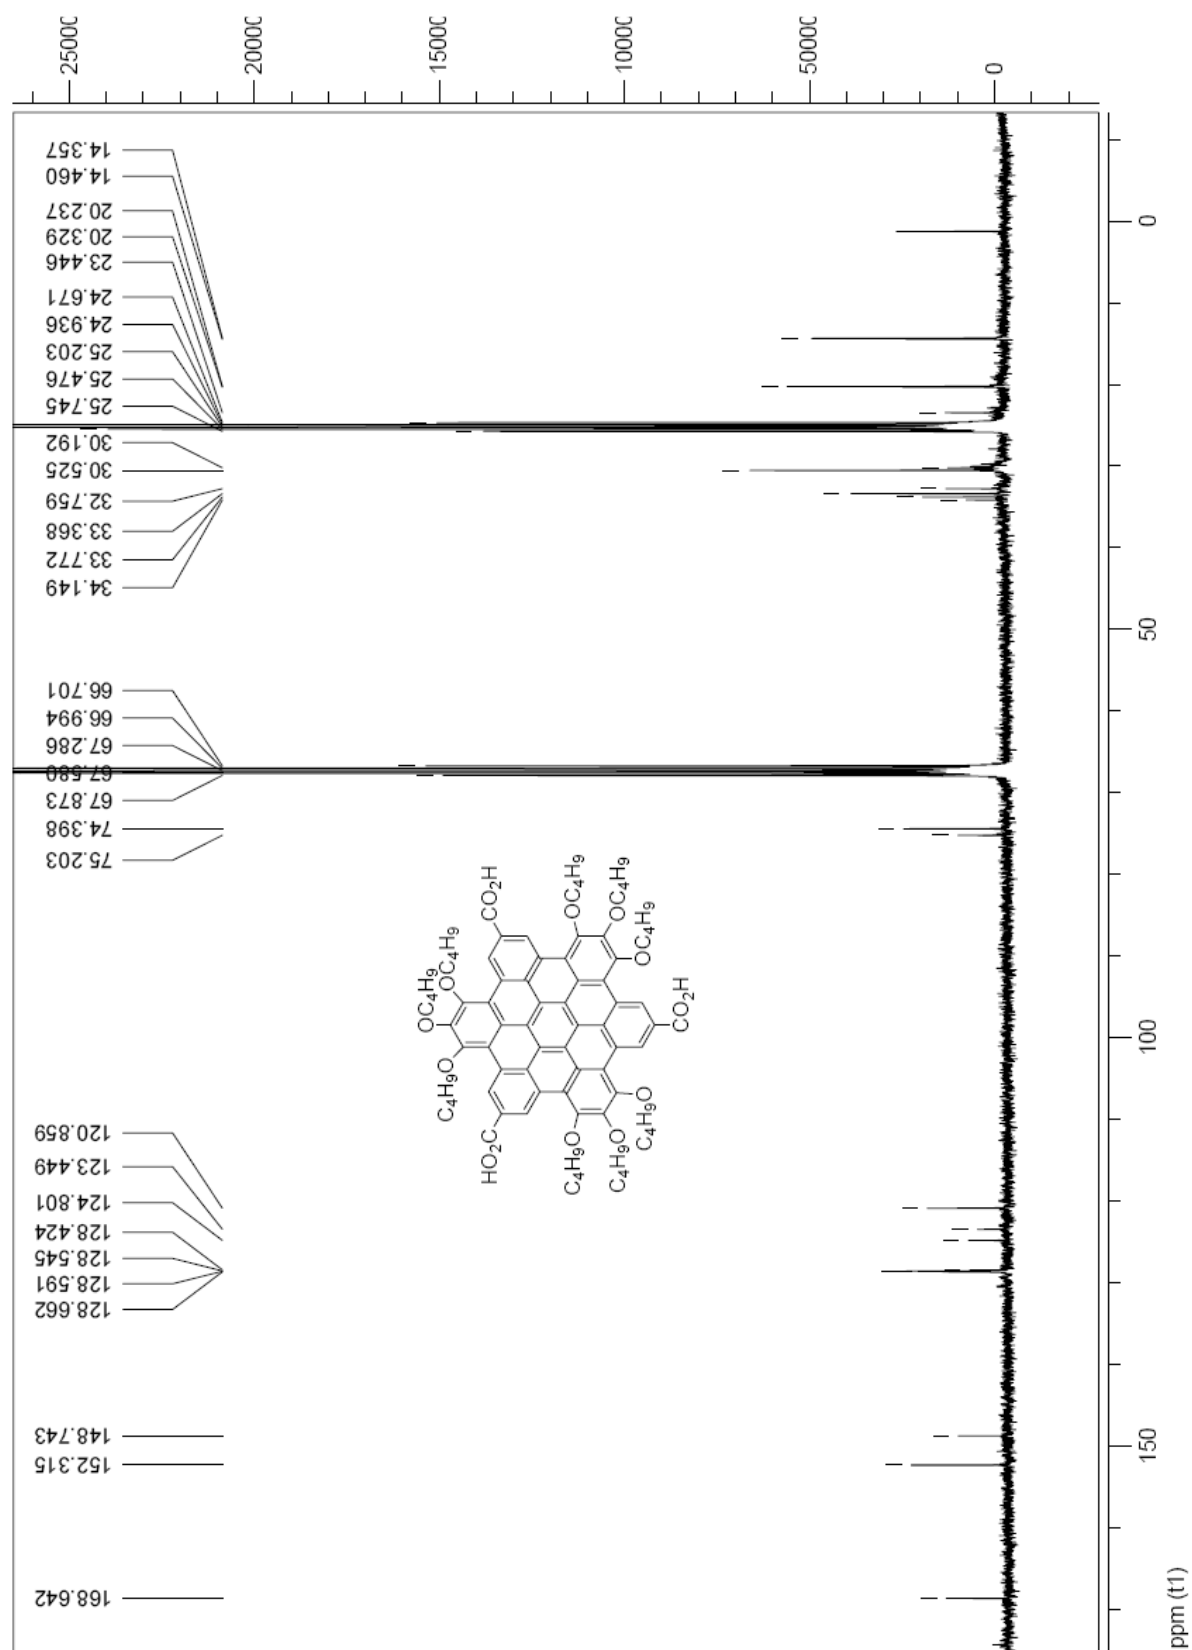

Supplement: c6nj03962f1.pdf [file c6nj03962f1.pdf]
